# Supplementary material for: Analysis of a gene co-expression network establishes robust association between Col5a2 and ischemic heart disease
Source: PubMed Central journal article supplement (PMC3637268; doi:10.1186/1755-8794-6-13), 2013-04-10
Supplement: 1755-8794-6-13-S2.pdf [file 1755-8794-6-13-S2.pdf]

### Quality and quantification of Col5a2 RNA

| Intervention | Nanodrop (A260/A230) | Nanodrop (A260/A280) | Bioanalyzer (RIN) | Mean Raw Cq value (GAPDH) | Mean Raw Cq value (Col5a2) | Pre-processed data |
|--------------|----------------------|----------------------|-------------------|---------------------------|----------------------------|--------------------|
| Sham         | 2.25                 | 2.09                 | 6.9               | 14.65                     | 23.96                      | 1.58E-03           |
| Sham         | 1.03                 | 2.09                 |                   | 14.57                     | 24.38                      | 1.11E-03           |
| Sham         | 2.17                 | 2.07                 | 7.5               | 14.76                     | 24.4                       | 1.25E-03           |
| Sham         | 2.25                 | 2.09                 | 7                 | 14.47                     | 24.6                       | 8.33E-04           |
| Sham         | 1.59                 | 2.09                 | 7.9               | 14.54                     | 24.69                      | 8.80E-04           |
| Sham         | 1.42                 | 2.1                  | 8.4               | 14.56                     | 24.86                      | 7.93E-04           |
| Infarction   | 2.08                 | 2.09                 | 7.1               | 15.55                     | 21.53                      | 1.58E-02           |
| Infarction   | 2.22                 | 2.04                 | 7                 | 15.69                     | 22.01                      | 1.25E-02           |
| Infarction   | 2.22                 | 2.05                 | 7.3               | 15.01                     | 22.64                      | 5.05E-03           |
| Infarction   | 1.71                 | 2.06                 |                   | 14.57                     | 22.68                      | 3.62E-03           |
| Infarction   | 2.29                 | 2.08                 | 7.9               | 15.03                     | 22.96                      | 4.10E-03           |
| Infarction   | 2.1                  | 2.09                 | 7.5               | 14.57                     | 23.06                      | 2.78E-03           |
| Infarction   | 2.14                 | 2.06                 |                   | 14.5                      | 23.27                      | 2.29E-03           |
| Infarction   | 2.26                 | 2.07                 | 7.9               | 14.35                     | 23.6                       | 1.64E-03           |
| Infarction   | 2.26                 | 2.1                  | 7.8               | 14.52                     | 23.76                      | 1.65E-03           |
| Infarction   | 2.18                 | 2.06                 | 6.4               | 16.36                     | 24.52                      | 3.50E-03           |
| Infarction   | 2.22                 | 2.08                 | 7.8               | 14.92                     | 24.57                      | 1.24E-03           |
| Infarction   | 1.46                 | 2.05                 |                   | 14.37                     | 24.6                       | 8.92E-04           |
| Infarction   | 2.29                 | 2.09                 | 7.8               | 14.6                      | 24.68                      | 9.24E-04           |
| Infarction   | 0.92                 | 2.09                 | 7.6               | 14.71                     | 24.92                      | 8.44E-04           |
| Infarction   | 1.64                 | 1.82                 | 7.1               | 16.34                     | 25.5                       | 1.75E-03           |
